# Supplementary material for: Individual resting-state alpha peak frequency and within-trial changes in alpha peak frequency both predict visual dual-pulse segregation performance
Source: PubMed Central journal article supplement — Cereb Cortex. 2022 Feb 8;32(23):5455–66. doi: 10.1093/cercor/bhac026 (PMC9712717; doi:10.1093/cercor/bhac026), 2022-02-08
Supplement: supplementalmaterials_bhac026.pdf [file supplementalmaterials_bhac026.pdf]

1

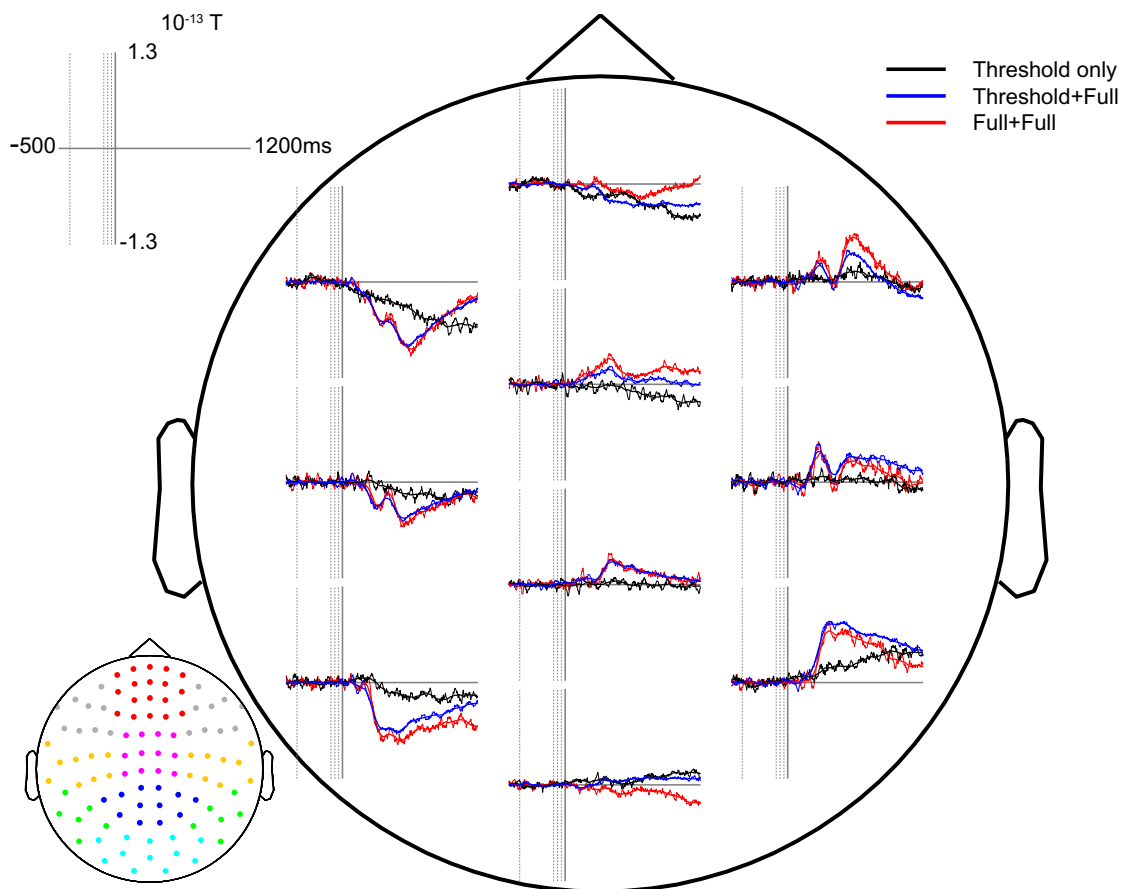

2

*Figure S1: Topographic overview of averaged ERFs (magnetometers). For the purpose of illustration, NT + Full conditions (with ISIs of 33, 67, 100 and 400ms) have been averaged across ISI value for better signal-to-noise ratio. The lower left plot illustrates sensor averaging. The four faint vertical gray lines mark the temporal positions of the threshold stimuli in the NT + Full condition. Thin lines represent maxfiltered data, thick lines have additionally been smoothed with a moving 100ms window (approximating 10Hz lowpass). Baseline and detrending was performed on [-500 0]ms interval.*

3

4

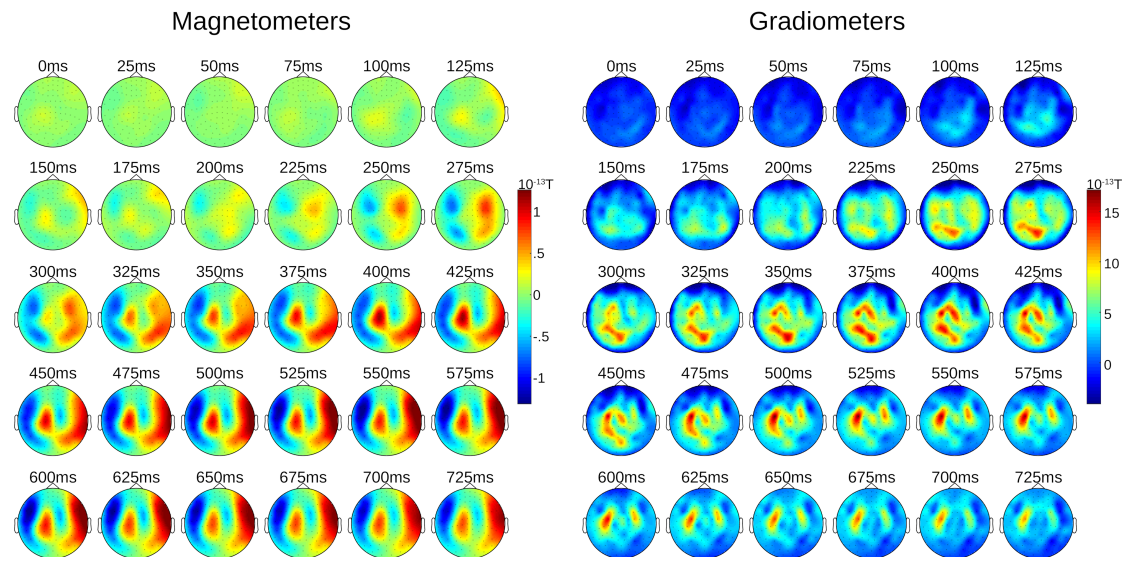

5

Figure S2: Topographic Time Course. Magnetometers and combined gradiometers, based on the averaged NT + Full conditions. Time values given indicate the central sample of a 25ms window. The average of [-50ms 0ms] has been subtracted for baseline normalization.

6

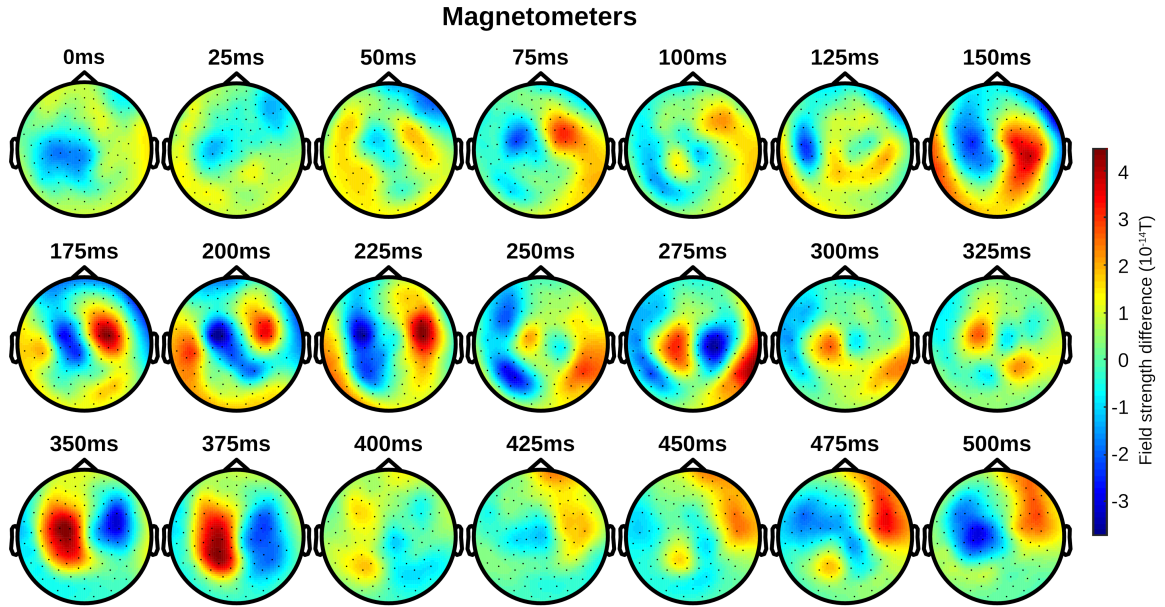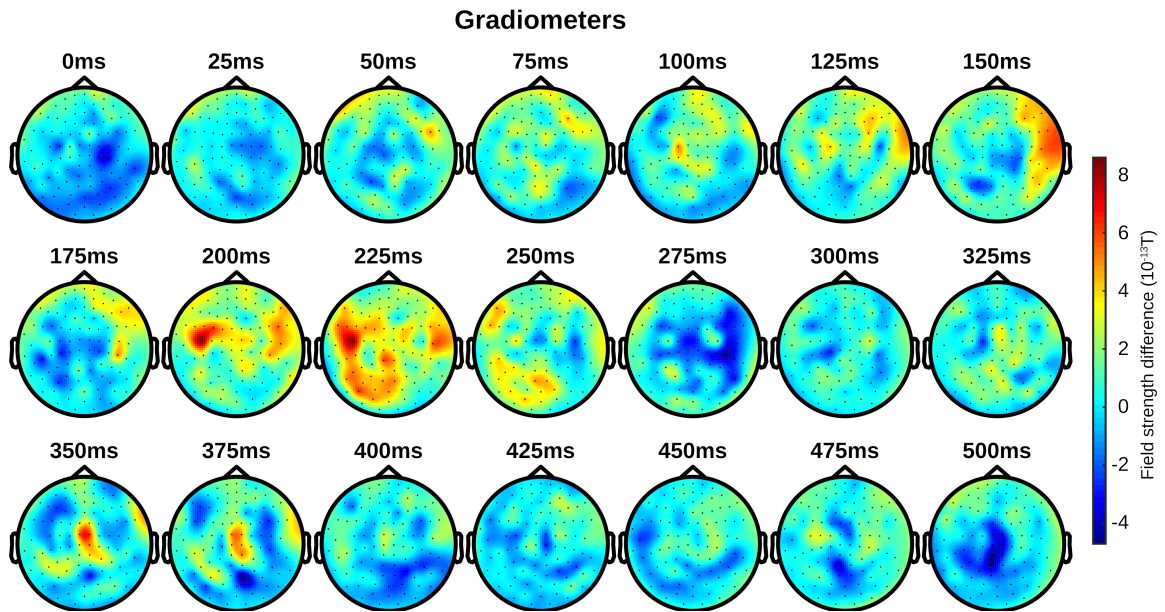

Figure S3: Topography of contrast (difference) between Full+Full and NT+Full conditions ( $Full+Full - NT+Full$ ). The average of  $[-50ms \ 0ms]$  has been subtracted for baseline normalization. Top group: Magnetometers. Bottom group: Combined gradiometers.
